# Supplementary material
Source: PubMed Central journal article supplement (PMC9064723)
Supplement: 330_2022_8833_MOESM1_ESM.pdf [file 330_2022_8833_MOESM1_ESM.pdf]

# Clinical DWI

\* Required

1. Email address \*

---

2. Is DWI part of your clinical MRI protocol? \*

*Mark only one oval.*

Yes

No    *Skip to question 18*

DWI technique

3. What is a clinical acceptable scan time for a DWI sequence?

*Mark only one oval.*

- 3 minutes
- 4 minutes
- 5 minutes
- 6 minutes
- > 6 minutes

4. Do you work with 3T or 1.5T MRI scanners?

*Check all that apply.*

- 1.5T
- 3T

Other:  \_\_\_\_\_

5. How many channels does your coil have?

*Check all that apply.*

- 4 channels
- 8 channels
- 16 channels

Other:  \_\_\_\_\_

6. How many b-values do you acquire?

*Mark only one oval.*

- 2
- 3
- 4
- 5
- >5

7. If you acquire more than 2 b values, which high b-value do you prefer to use for assessment of lesion restricted diffusivity?

*Mark only one oval.*

- 800
- 1000
- 1200
- 1500
- 1800
- Other: \_\_\_\_\_

8. Do you use synthetic higher b-values?

*Mark only one oval.*

- Yes
- No

Indications

## 9. Do you use DWI for

*Check all that apply.*

- Differentiation of benign and malignant enhancing breast lesions
- Assessment of response to neoadjuvant treatment
- Prediction of response to neoadjuvant treatment
- Non-contrast screening

Other:  \_\_\_\_\_

### Qualitative Evaluation

## 10. Do you perform qualitative evaluation of DW images acquired with high b-value?

*Mark only one oval.*

- Yes
- No

## 11. Do you think that qualitative descriptors of BIRADS DCE-MRI could be applied to DW images acquired with high b-values?

*Mark only one oval.*

- Yes     *Skip to question 12*
- No     *Skip to question 13*

### DWI descriptors

12. If yes, which qualitative descriptors do you think could be assessed on DW images acquired with large b-values (multiple choice possible)?

*Check all that apply.*

- Shape  
 Margins  
 Internal characteristics  
 Distribution

Other:  \_\_\_\_\_

### Quantitative Evaluation

13. How do you measure ADC

*Mark only one oval.*

- Whole lesion 2D ROI  
 Whole lesion 3D ROI  
 Focused 2D ROI selecting the lowest ADC value within the enhancing lesion  
 Focused 3D ROI selecting the lowest ADC value within the enhancing lesion

14. What ADC threshold do you use for differentiation of benignity and malignancy?

*Mark only one oval.*

- $1.2 \times 10^{-3} \text{ mm}^2/\text{s}$   
  $1.25 \times 10^{-3} \text{ mm}^2/\text{s}$   
  $1.3 \times 10^{-3} \text{ mm}^2/\text{s}$   
  $1.4 \times 10^{-3} \text{ mm}^2/\text{s}$   
  $1.5 \times 10^{-3} \text{ mm}^2/\text{s}$   
 Other: \_\_\_\_\_

## Reporting

15. Do you mention DWI in the imaging technique section of your MRI report?

*Mark only one oval.*

- Yes  
 No  
 Maybe

16. Do you mention restricted diffusivity of lesions in findings of your MRI report?

*Mark only one oval.*

- Yes  
 No  
 Maybe

17. Do you mention restricted ADC values in findings of your MRI report?

*Mark only one oval.*

- Yes  
 No  
 Maybe

EUSOBI International Breast Diffusion-Weighted Imaging working group.

18. Are you aware of the EUSOBI International Breast Diffusion-Weighted Imaging working group?

*Mark only one oval.*

Yes

No

19. Are you aware of the Diffusion-weighted imaging of the breast-a consensus and mission statement from the EUSOBI International Breast Diffusion-Weighted Imaging working group?

*Mark only one oval.*

Yes

No

20. Are you interested in becoming part of the EUSOBI International Breast Diffusion-Weighted Imaging working group?

*Mark only one oval.*

Yes

No

Maybe

---

This content is neither created nor endorsed by Google.

Google Forms
